# Supplementary material for: Hybrid-modeling for PTFE polymerization reaction with deep learning-based reaction rate model
Source: publisher site journal article supplement (doi:10.1515/ijcre-2023-0062), 2023-10-04
Supplement: Supplementary file 1 [file j_ijcre-2023-0062_suppl_001.docx]

**List of symbols**

| Symbol | Meaning | Symbol | Meaning | Symbol | Meaning |
| --- | --- | --- | --- | --- | --- |
|  | The heat transfer area of the equipment |  | The chain transfer agent |  | The m moments of the active polymer |
|  | An arbitrary series |  | The matrix of the change in the number of reaction molecules |  | The m moments of the dead polymer |
|  | The bias term of the forget gate |  | The bias term of the forget gate |  | The bias term of the memory cell |
|  | The bias term of the output gate |  | Different reactant concentrations |  | The concentrations of chain transfer agent |
|  | The concentrations of initiator |  | The *i*th reactant inflow material concentrations |  | The *i*th reactant outflow material concentrations |
|  | The concentration of different reactants in the reaction process |  | The concentrations of desired polymerization monomer |  | The specific heat capacity of the input monomer |
|  | The specific heat capacity of the product |  | The heat capacity value of the cooling water at |  | the molecular chain length concentration of the polymer |
|  | The concentrations of primary radical |  | The concentrations of solvent |  | The matrix that produces PTFE molecular chains in m reactions |
|  | A dead polymer with chain length n |  | A stable PTFE molecule |  | The cooling water flow rate |
|  | The mapping relationship from model input to output |  | The molar flow rates of the *i*th reactant inflow materials |  | The molar flow rates of the *i*th reactant outflow material |
|  | The amount of monomer feed |  | The mapping function |  | The mapping function |
|  | The heat transfer coefficient |  | The enthalpy values at the inlet temperatures of the jacketed cooling water, |  | The enthalpy values at the outlet temperatures of the jacketed cooling water |
|  | The unit output calculation process |  | The output of the previous moment |  | Initiator |
|  | Input gate |  | The kinetic rate constant for initiator decomposition |  | The kinetic rate constant for chain initiation |
|  | The reaction rate constant of the *j*th reaction |  | The kinetic rate constant for chain growth |  | The kinetic rate constant for chain termination |
|  | The kinetic rate constant for transfer to the chain transfer agent |  | The kinetic rate constant for transfer to monomer |  | The kinetic rate constant for transfer to solvent |
|  | Monomer |  | The molecular weight of the indicated monomer |  | The molecular weight of one chain link of PTFE |
|  | Moments |  | The total amount of jacketed cooling water |  | The mass of the input monomer |
|  | The mass of the resulting product |  | The length of the polymer chain |  | The total number of reactions |
|  | The average molecular length |  | Output gate |  | A polymerization degree 1 active polymer |
|  | Short-chain radicals |  | Longer radicals |  | The heat obtained after heat exchange with the jacket |
|  | The heat directly from the jacket inlet cooling water |  | The heat of the cooling water flowing away from the jacket outlet |  | The retained heat |
|  | Primary radicals |  | The reaction rate of m reactions |  | The reaction rate of the *i*th reaction |
|  | The solvent |  | The state of the cell at time *t* |  | The amount of information the cell state |
|  | The candidate states of the memory cell | T | The temperature of the reaction |  | The temperature inside the reactor |
|  | The average temperature of the cooling water in the jacket |  | The independent variable |  | The hyperbolic tangent activation function |
|  | Different operating variables of the reaction process |  | The volume of the polymerization kettle |  | The volume of reactants |
|  | The stoichiometric number of the *i*th reactant in the *j*th reaction |  | The weight matrix of the output gate |  | The weight matrix of the memory cell |
|  | The weight matrix of the forget gate |  | The weight matrix of the input gate |  | A random variable |
|  | The input of the current moment |  | Forget gate |  | The power of |
|  | The initiator efficiency |  | The sigmoid activation function |  | A generating function of the series |
|  | A nonlinear mapping relationship |  | The reaction enthalpy of the *j*th reaction |  | Hadamard product |
|  | Matmul product |  |  |  |  |
